# Supplementary material for: Involvement of a citrus meiotic recombination TTC-repeat motif in the formation of gross deletions generated by ionizing radiation and MULE activation
Source: PubMed Central journal article supplement (PMC4334395; doi:10.1186/s12864-015-1280-3), 2015-02-13
Supplement: 12864_2015_1280_MOESM1_ESM.pdf [file 12864_2015_1280_MOESM1_ESM.pdf]

**Table S1. Discriminating fruit traits of three Clementines**

|                    | CLE <sup>a</sup>  | ARR <sup>b</sup>  | NER <sup>b</sup> |
|--------------------|-------------------|-------------------|------------------|
| Ripening period    | Standard          | Precocious        | Precocious       |
| Acidity reduction  | Dec               | Nov               | Nov              |
| Sugar accumulation | Dec               | Nov               | Nov              |
| Color change       | Mid Nov           | Late Oct          | Late Oct         |
| Presence of seeds  | Self-incompatible | Self-incompatible | Sterile          |

<sup>a</sup> Clemenules, <sup>b</sup> Arrufatina, <sup>c</sup> Nero
