# Supplementary material for: Involvement of a citrus meiotic recombination TTC-repeat motif in the formation of gross deletions generated by ionizing radiation and MULE activation
Source: PubMed Central journal article supplement (PMC4334395; doi:10.1186/s12864-015-1280-3), 2015-02-13
Supplement: 12864_2015_1280_MOESM2_ESM.pdf [file 12864_2015_1280_MOESM2_ESM.pdf]

**Table S2. Sequencing, mapping and variant calling statistics of the Illumina short read sequences of three Clementine genomes**

| Variety | Total Reads <sup>a</sup> | Filtered Reads <sup>b</sup> | Paired reads | %GC   | Coverage | >15x <sup>c</sup> | SNVs Total | SNVs Het | SNVs Hom | Indels Total | Indels Het | Indels Hom |
|---------|--------------------------|-----------------------------|--------------|-------|----------|-------------------|------------|----------|----------|--------------|------------|------------|
| CLE     | 456194154                | 207805481                   | 204655262    | 33.16 | 68.95x   | 83.14             | 1414773    | 1400808  | 13965    | 158995       | 147577     | 11418      |
| ARR     | 227338589                | 131179259                   | 129256801    | 32.05 | 43.53x   | 81.46             | 1424483    | 1411343  | 13140    | 157942       | 147311     | 10631      |
| NER     | 211454854                | 118363024                   | 116579261    | 32.51 | 39,27x   | 81.79             | 1440013    | 1427321  | 12692    | 157923       | 147565     | 10358      |

<sup>a</sup>Total reads: after removal of duplicates

<sup>b</sup>Filtered reads: after quality filter

<sup>c</sup>>15x: percentage of genome with coverage higher than 15x
