# Supplementary material for: Involvement of a citrus meiotic recombination TTC-repeat motif in the formation of gross deletions generated by ionizing radiation and MULE activation
Source: PubMed Central journal article supplement (PMC4334395; doi:10.1186/s12864-015-1280-3), 2015-02-13
Supplement: 12864_2015_1280_MOESM3_ESM.pdf [file 12864_2015_1280_MOESM3_ESM.pdf]

**Table S3. Rearrangements in chromosome 3, 8 and 6 of ARR and NER**

| Variety | Rearrangement | Size (bp) | Chr                | Start              | End      | Pair ends orientation | % <sup>a</sup> |
|---------|---------------|-----------|--------------------|--------------------|----------|-----------------------|----------------|
| ARR     | Inversion     | 6926      | 3                  | 6785295            | 6792253  | - -                   | 14             |
|         | Deletion      | 1894102   | 3                  | 6785325            | 8686355  | + +                   | 11             |
| NER     | Deletion      | 1941554   | 3                  | 6782589            | 8724143  | + -                   | 40             |
|         | Deletion      | 908471    | 8                  | 12602313           | 13510784 | + -                   | 53             |
|         | Deletion      | 69130     | 8                  | 13566864           | 13635994 | + -                   | 50             |
|         | Translocation |           | 721                | (8;6) <sup>b</sup> | 13634859 | 21997756              | - +            |
|         |               |           | (8;6) <sup>b</sup> | 13635580           | 21997789 | + -                   | 46             |

<sup>a</sup> Percentage of pair ends supporting rearrangement

<sup>b</sup> Chromosomes involved in translocation
