# Supplementary material for: Involvement of a citrus meiotic recombination TTC-repeat motif in the formation of gross deletions generated by ionizing radiation and MULE activation
Source: PubMed Central journal article supplement (PMC4334395; doi:10.1186/s12864-015-1280-3), 2015-02-13
Supplement: 12864_2015_1280_MOESM5_ESM.pdf [file 12864_2015_1280_MOESM5_ESM.pdf]

**Table S4.** CitMule Motif analyses with InterProScan**Sequence "CitMule\_1" crc64 checksum: F0DF841C7DEFB295 length: 795 aa.**

| InterPro IPR004330 FAR1 DNA binding domain |           |           |           |
|--------------------------------------------|-----------|-----------|-----------|
| method                                     | AccNumber | shortName | location  |
| HMMPfam                                    | PF03101   | FAR1      | T[34-118] |
|                                            | 6.7e-15   |           |           |

| InterPro IPR006564 Zinc finger, PMZ-type          |           |                                       |            |
|---------------------------------------------------|-----------|---------------------------------------|------------|
| Molecular Function: zinc ion binding (GO:0008270) |           |                                       |            |
| method                                            | AccNumber | shortName                             | location   |
| HMMSmart                                          | SM00575   | plant mutator transposase zinc finger | T[532-559] |
|                                                   | 2.8e-08   |                                       |            |

| InterPro IPR007527 Zinc finger, SWIM-type         |           |           |            |
|---------------------------------------------------|-----------|-----------|------------|
| Molecular Function: zinc ion binding (GO:0008270) |           |           |            |
| method                                            | AccNumber | shortName | location   |
| HMMPfam                                           | PF04434   | SWIM      | T[523-554] |
|                                                   | 1.6e-08   |           |            |
| ProfileScan                                       | PS50966   | ZF_SWIM   | T[521-557] |
|                                                   | 11.140    |           |            |

| InterPro IPR018289 MULE transposase domain |           |           |            |
|--------------------------------------------|-----------|-----------|------------|
| method                                     | AccNumber | shortName | location   |
| HMMPfam                                    | PF10551   | MULE      | T[245-335] |
|                                            | 1.9e-27   |           |            |

**Sequence "CitMule\_2" crc64 checksum: 056D9725146CDB81 length: 795 aa.**

| InterPro IPR004330 FAR1 DNA binding domain |           |           |           |
|--------------------------------------------|-----------|-----------|-----------|
| method                                     | AccNumber | shortName | location  |
| HMMPfam                                    | PF03101   | FAR1      | T[34-118] |
|                                            | 4.6e-15   |           |           |

| InterPro IPR006564 Zinc finger, PMZ-type          |           |                                       |            |
|---------------------------------------------------|-----------|---------------------------------------|------------|
| Molecular Function: zinc ion binding (GO:0008270) |           |                                       |            |
| method                                            | AccNumber | shortName                             | location   |
| HMMSmart                                          | SM00575   | plant mutator transposase zinc finger | T[532-559] |
|                                                   | 2.8e-08   |                                       |            |

| InterPro IPR007527 Zinc finger, SWIM-type         |           |           |            |
|---------------------------------------------------|-----------|-----------|------------|
| Molecular Function: zinc ion binding (GO:0008270) |           |           |            |
| method                                            | AccNumber | shortName | location   |
| HMMPfam                                           | PF04434   | SWIM      | T[523-554] |
|                                                   | 1.6e-08   |           |            |
| ProfileScan                                       | PS50966   | ZF_SWIM   | T[521-557] |
|                                                   | 11.140    |           |            |

| InterPro IPR018289 MULE transposase domain |           |           |            |
|--------------------------------------------|-----------|-----------|------------|
| method                                     | AccNumber | shortName | location   |
| HMMPfam                                    | PF10551   | MULE      | T[245-335] |
|                                            | 7.3e-28   |           |            |

**Sequence "CitMule\_3" crc64 checksum: C9BC82AC2C535D52 length: 805 aa.**

---

|                 |                        |                                      |           |
|-----------------|------------------------|--------------------------------------|-----------|
| InterPro method | IPR004330<br>AccNumber | FAR1 DNA binding domain<br>shortName | location  |
| HMMPfam         | PF03101<br>6.8e-15     | FAR1                                 | T[34-118] |

---

|                                                   |                        |                                       |            |
|---------------------------------------------------|------------------------|---------------------------------------|------------|
| InterPro method                                   | IPR006564<br>AccNumber | Zinc finger, PMZ-type<br>shortName    | location   |
| Molecular Function: zinc ion binding (GO:0008270) |                        |                                       |            |
| HMMSmart                                          | SM00575<br>2.8e-08     | plant mutator transposase zinc finger | T[532-559] |

---

|                                                   |                        |                                     |            |
|---------------------------------------------------|------------------------|-------------------------------------|------------|
| InterPro method                                   | IPR007527<br>AccNumber | Zinc finger, SWIM-type<br>shortName | location   |
| Molecular Function: zinc ion binding (GO:0008270) |                        |                                     |            |
| HMMPfam                                           | PF04434<br>1.9e-08     | SWIM                                | T[526-554] |
| ProfileScan                                       | PS50966<br>11.214      | ZF_SWIM                             | T[521-557] |

---

|                 |                        |                                      |            |
|-----------------|------------------------|--------------------------------------|------------|
| InterPro method | IPR018289<br>AccNumber | MULE transposase domain<br>shortName | location   |
| HMMPfam         | PF10551<br>2e-27       | MULE                                 | T[245-335] |

---

**Sequence "CitMule\_4" crc64 checksum: 17E170A04BCBEEAB length: 805 aa.**

---

|                 |                        |                                      |           |
|-----------------|------------------------|--------------------------------------|-----------|
| InterPro method | IPR004330<br>AccNumber | FAR1 DNA binding domain<br>shortName | location  |
| HMMPfam         | PF03101<br>6.8e-15     | FAR1                                 | T[34-118] |

---

|                                                   |                        |                                       |            |
|---------------------------------------------------|------------------------|---------------------------------------|------------|
| InterPro method                                   | IPR006564<br>AccNumber | Zinc finger, PMZ-type<br>shortName    | location   |
| Molecular Function: zinc ion binding (GO:0008270) |                        |                                       |            |
| HMMSmart                                          | SM00575<br>2.8e-08     | plant mutator transposase zinc finger | T[532-559] |

---

|                                                   |                        |                                     |            |
|---------------------------------------------------|------------------------|-------------------------------------|------------|
| InterPro method                                   | IPR007527<br>AccNumber | Zinc finger, SWIM-type<br>shortName | location   |
| Molecular Function: zinc ion binding (GO:0008270) |                        |                                     |            |
| HMMPfam                                           | PF04434<br>1.7e-08     | SWIM                                | T[523-554] |
| ProfileScan                                       | PS50966<br>11.140      | ZF_SWIM                             | T[521-557] |

---

|                 |                        |                                      |            |
|-----------------|------------------------|--------------------------------------|------------|
| InterPro method | IPR018289<br>AccNumber | MULE transposase domain<br>shortName | location   |
| HMMPfam         | PF10551<br>1.2e-27     | MULE                                 | T[245-335] |

---
