# Supplementary material for: Involvement of a citrus meiotic recombination TTC-repeat motif in the formation of gross deletions generated by ionizing radiation and MULE activation
Source: PubMed Central journal article supplement (PMC4334395; doi:10.1186/s12864-015-1280-3), 2015-02-13
Supplement: 12864_2015_1280_MOESM6_ESM.pdf [file 12864_2015_1280_MOESM6_ESM.pdf]

**Table S5. Sequences obtained with a MEGABLASTN search performed against the GenBank citrus ESTs**

| Acc. N°    | Clone name                      | Library                                                                                                                         | Query Citmule | % Identity | Alignment length | q. start | q. end | s. start | s. end | evalue |
|------------|---------------------------------|---------------------------------------------------------------------------------------------------------------------------------|---------------|------------|------------------|----------|--------|----------|--------|--------|
| EY753043.1 | CS00-C5-003-050-D05-CT.F        | Sweet orange flower greenhouse plant Citrus sinensis cDNA                                                                       | 1 and 2       | 96.45      | 733              | 1263     | 1989   | 13       | 745    | 0.0    |
| EY746647.1 | CS00-C5-003-036-B01-CT.F        | Sweet orange flower greenhouse plant Citrus sinensis                                                                            | 1 and 2       | 95.21      | 689              | 1269     | 1945   | 31       | 719    | 0.0    |
| EY752157.1 | 23-508 CS00-C5-003-033-E03-CT.F | Sweet orange flower greenhouse plant Citrus sinensis cDNA                                                                       | 1 and 2       | 95.49      | 488              | 1263     | 1747   | 23       | 508    | 0.0    |
| CX289210.1 | C02010D11SK IF1                 | Citrus clementina cDNA clone C02010D11                                                                                          | 1 and 2       | 100.00     | 422              | 1056     | 1477   | 1        | 422    | 0.0    |
| EY710375.1 | CS00-C3-701-107-B12-CT.F        | Sweet orange fruit, development stadium (2 of 6) Citrus sinensis cDNA                                                           | 1 and 2       | 87.27      | 479              | 1018     | 1487   | 33       | 509    | 3E-150 |
| EY709068.1 | CS00-C3-701-105-H04-CT.F        | Sweet orange fruit, development stadium (2 of 6) Citrus sinensis cDNA                                                           | 1 and 2       | 93.50      | 277              | 986      | 1260   | 11       | 286    | 6E-112 |
| CX297718.1 | C06004E04SK                     | RindPdig24 Citrus clementina cDNA clone C06004E04                                                                               | 1 and 2       | 100.00     | 113              | 2276     | 2388   | 1        | 113    | 7E-52  |
| CX077986.1 | UCRCS08_6C05_g                  | Parent Washington Navel Orange Callus cDNA Library UCRCS08-2 Citrus sinensis cDNA clone UCRCS08-6C05-E10-1-6.g                  | 3 and 4       | 100.00     | 827              | 181      | 1007   | 829      | 3      | 0.0    |
| CX044986.1 | UCRCS07_20A05_b                 | Parent Washington Navel Orange Thrip-Challenged Flavedo cDNA Library UCRCS07 Citrus sinensis cDNA clone UCRCS07-20A05-A10-1-5.b | 3 and 4       | 100.00     | 509              | 1778     | 2286   | 797      | 289    | 0.0    |
| CN189940.1 | UCRCS06_0002K16_f               | Washington Navel Orange Stored Fruit Rind cDNA Library Citrus sinensis cDNA clone CS_WEc0002K16                                 | 3 and 4       | 100.00     | 234              | 2053     | 2286   | 544      | 311    | 4E-119 |
| CK933199.1 | CGF1004289_E03                  | Developing fruit juice sac at 38 DAFB Citrus sinensis cDNA clone JSJune0002_IVF_E03 5'                                          | 3 and 4       | 100.00     | 238              | 1        | 238    | 275      | 512    | 2E-121 |
| CX077985.1 | UCRCS08_6C05_b                  | Parent Washington Navel Orange Callus cDNA Library UCRCS08-2 Citrus sinensis cDNA clone UCRCS08-6C05-E10-1-5.b                  | 3 and 4       | 100.00     | 201              | 1        | 201    | 658      | 858    | 8E-101 |
| FC922781.1 | KN0AAM1BD08RM1                  | SLH Citrus sinensis cDNA clone KN0AAM1BD08                                                                                      | 3 and 4       | 100.00     | 133              | 2286     | 2418   | 675      | 543    | 5E-63  |
| FE659144.1 | C83                             | 'Hong Anliu' sweet orange SSH library Citrus sinensis cDNA 5'                                                                   | 3 and 4       | 100.00     | 133              | 2286     | 2418   | 168      | 300    | 5E-63  |
| EY698592.1 | CS00-C3-700-073-E10-CT.F        | Sweet orange fruit, development stadium (1 of 6) Citrus sinensis cDNA                                                           | 3 and 4       | 100.00     | 133              | 2286     | 2418   | 690      | 558    | 5E-63  |
| EY754961.1 | CS12-C1-001-022-C08-CT.F        | Sweet orange leaf, field plant A Citrus sinensis cDNA                                                                           | 3 and 4       | 100.00     | 133              | 2286     | 2418   | 651      | 519    | 5E-63  |
| EY754580.1 | CS12-C1-001-017-D11-CT.F        | Sweet orange leaf, field plant A Citrus sinensis cDNA                                                                           | 3 and 4       | 100.00     | 133              | 2286     | 2418   | 651      | 519    | 5E-63  |
| EY668713.1 | CS00-C1-102-066-C08-CT.F        | Sweet orange leaf, infected with Xylella fastidiosa (stage 2 of 2) Citrus sinensis cDNA                                         | 3 and 4       | 100.00     | 133              | 2286     | 2418   | 670      | 538    | 5E-63  |
| EY754485.1 | CS12-C1-001-016-B11-CT.F        | Sweet orange leaf, field plant A Citrus sinensis cDNA                                                                           | 3 and 4       | 100.00     | 133              | 2286     | 2418   | 651      | 519    | 5E-63  |
| EY671371.1 | CS00-C1-102-080-D08-CT.F        | Sweet orange leaf, infected with Xylella fastidiosa (stage 2 of 2) Citrus sinensis cDNA                                         | 3 and 4       | 100.00     | 133              | 2286     | 2418   | 674      | 542    | 5E-63  |
| EX447666.1 | Volcani_8_11_A2                 | Volcani08 Citrus reticulata x Citrus temple cDNA                                                                                | 3 and 4       | 100.00     | 133              | 2286     | 2418   | 588      | 456    | 5E-63  |
| DN621587.1 | UCRCS11_06O17_f                 | Parent Washington Navel Orange Scale-Infested Rind cDNA Library UCRCS11 Citrus sinensis cDNA clone CS_WEd0006O17                | 3 and 4       | 100.00     | 133              | 2286     | 2418   | 142      | 274    | 5E-63  |
| CX672650.1 | UCRCS10_18D03_g                 | Madame Vinous Sweet Orange Multiple Pathogen-Infected cDNA Library UCRCS10 Citrus sinensis cDNA clone UCRCS10-18D03-G6-6.g      | 3 and 4       | 100.00     | 133              | 2286     | 2418   | 671      | 539    | 5E-63  |
