# Supplementary material for: Involvement of a citrus meiotic recombination TTC-repeat motif in the formation of gross deletions generated by ionizing radiation and MULE activation
Source: PubMed Central journal article supplement (PMC4334395; doi:10.1186/s12864-015-1280-3), 2015-02-13
Supplement: 12864_2015_1280_MOESM7_ESM.pdf [file 12864_2015_1280_MOESM7_ESM.pdf]

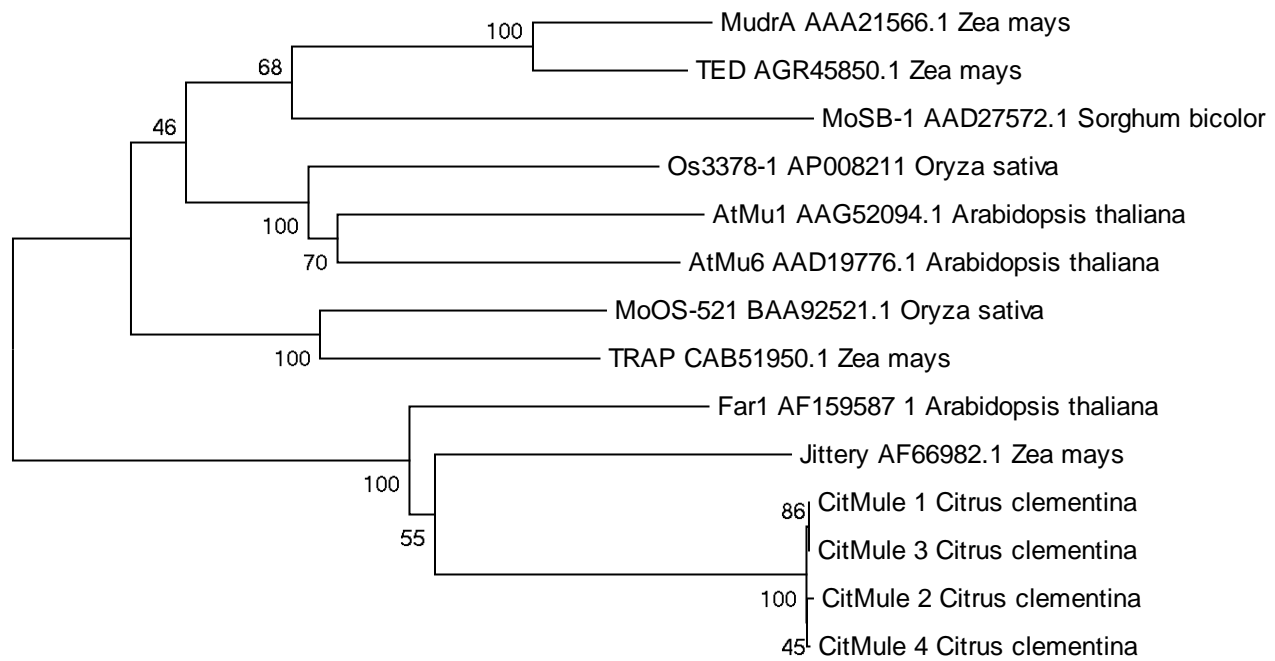

0.2
