# Supplementary material for: Involvement of a citrus meiotic recombination TTC-repeat motif in the formation of gross deletions generated by ionizing radiation and MULE activation
Source: PubMed Central journal article supplement (PMC4334395; doi:10.1186/s12864-015-1280-3), 2015-02-13
Supplement: 12864_2015_1280_MOESM11_ESM.pdf [file 12864_2015_1280_MOESM11_ESM.pdf]

**Table S6.** Alternative allele frequency ( $\pm$  St dev) in the deletion identified in chromosome 3 of ARR and NER

| Sequencing            | CLE            | ARR            | NER            |
|-----------------------|----------------|----------------|----------------|
| Illumina <sup>a</sup> | 0.48 $\pm$ 0.1 | 0.81 $\pm$ 0.1 | 0.71 $\pm$ 0.1 |
| Sanger <sup>b</sup>   |                |                |                |
| Young leaf            |                |                |                |
| Amplification         | 0.52 $\pm$ 0.1 | 0.79 $\pm$ 0.1 | 0.80 $\pm$ 0.1 |
| TA cloning            | 0.58 $\pm$ 0.1 | 0.78 $\pm$ 0.1 | 0.85 $\pm$ 0.1 |
| Fruit flavedo         |                |                |                |
| Amplification         | 0.54 $\pm$ 0.0 | 0.78 $\pm$ 0.1 | 0.75 $\pm$ 0.1 |

<sup>a</sup> Average allelic frequency based on Illumina reads (n > 10000)

<sup>b</sup> Average allelic frequency based on after either direct amplification or after TA cloning
