# Supplementary material for: Involvement of a citrus meiotic recombination TTC-repeat motif in the formation of gross deletions generated by ionizing radiation and MULE activation
Source: PubMed Central journal article supplement (PMC4334395; doi:10.1186/s12864-015-1280-3), 2015-02-13
Supplement: 12864_2015_1280_MOESM13_ESM.pdf [file 12864_2015_1280_MOESM13_ESM.pdf]

genome scaffold\_3:7796500-7798450

7796500 TTTTATTTAAGATTACTTTAAATTTATTTTTATTTATTATCTATGATTT  
550 AACTAAATTGGTACTTTTACTTCTACTAACTCTTGAGATTAAATTTTCAT  
600 TACTTGTATATTTAAAAATTTATCAATAAAAATTAACATTTAATAATTTAT  
650 TGCATTATTTGATTGTACTAAATTTAATAATCACTAATATAATATTA  
700 AATAATCATGCAAAATATTAGCACCATTAATTAATTGATTCTATATAATA  
750 TTTTTAATAAATTGCTAAAAATTAATTAATATTTAGATTGTTTTATGTA  
800 TTTTTATTTTATTATTATATTATGACTGCCCAATAAATTTAAATTTTCTT  
850 ATTAATTAATTTTAAATGATTTTCATTATGATTATAAAATTTTATGAA  
900 TAATTAATATTATTTAAATATCAACTTAAATGCTATTTAATCTTATCTA  
950 AATATAATTTAATTTTACCAAATAAGACTATAAAATATAATCAATCTTA  
7797000 ATCCAATCTAACTTAATCCAGTCTAATTTTAATAATTAGTCCAATTC  
050 TATACGTGCCAAACGTAACCTAATAGTCTTGATAAATCCCCTTTGTGAA  
100 CTTATTGCTTTAACCTCAGTTTAAAATTACTIONTTAATCTTAGTTAGT  
150 TACATGACAAGAAAAGAAAAAAGTTCTTTTTCTTGTTACGCAT  
200 CACTCTCATCATTATTAATACTGCAGTCGCTGACTTTTTTGTTCAAG  
250 TAAGTAATAAATAATCTTTTCTTTCTTAATCTTTAATTATTAGATAAT  
300 TTTAATATATTTTTTTTTCTATTTCAAATGGCAAAGAAAGACAGAGAAT  
350 GTACAAGAATAGAGATTTTTTAAGAAAAAATTTCAAATAAAAGGAATA  
400 ATCCATTTAACAAATCAAATGTCAAAAAGTTAAGACAAAATTTGGGTG  
450 CAGATTACTAAATCTATGGCCATCAAGATAATCAATCTTTTGC TTTTT  
500 TTTATTGCTAGATTTTTGCTTCTTTATAGTAGATCGG TTTCTTCTTCTCT  
550 TCTTCTTCTGAGATAAACAATAATAAAGGAAAGCAATGGGGTTTAAAGAG  
600 GAGGGTTCATCGAGGGTTAGCCCTTGTAACTTATGTGATTTAGATAATC  
650 AACAGACATAATACAACAGGCTTGAATTAATCAAAGACACATGAATAAC  
700 AAGTCTTAATAAAAAAATAAAATGGGAAAGTCATTGAAGCTTGCTTGCT  
750 GTG TTTGCTCTGGTTTGCTTCTCCTGCCTTGTGAGCATCGCCGGTGCCCA  
800 AAACGGAACGTACCCGTGGTGTGTGATAAATTTTATTATTGCAGCATTG  
850 ATTTTCAATATTGTACTAAAATTTGATACCCGTGGTGCCTAAGTCAATGGA  
900 AGGAGGACAAAATTTCTGCGGAGTAGAGCACTTGTGAGGTCGAAATTTCT  
950 AATCTAACAAATTGAAGCATTGGGACATAGGCCTAATTGTATTTGTTTCAT  
7798000 TGATGAATGTGAACATGTGATGAATCTTTTTCGGATTTTGCTAATCCATG  
050 GGAATTTATAATCTCGAAGATGGAAGCATCAATGGTAAACATTTTTTGTAG  
100 ACCCATCAATCAATCCGTCTATGTGGGTGGAACAAATTAACTTCCAGC  
150 ATCTTTATCAATCTATCATTTCATTGGTTTTTTAATTTATCAAATCATT  
200 ATTTATTAACCTACCAATTATGGGTATTAATTTATTCAGTGTATACGCT  
250 ATTGTTGCGTACTCTTTAAACATCACCTCTTTGCTTGCTTACTCTAAAAA  
300 TAAATAATAATAATAATAATAAATGCAACATTAATCTTCTTTCAATATCA  
350 ACAATTTTTTTTTTTTCAAACAAGAAATTAGTAATAATTAATGAAATCA  
400 CATAGAATAGACTCAATTTTTTTTTTTCTTTCTTCTTGAAGCAATCAACT  
450 GTATCGCTTAAAAAATGTTTGTGAATGTGCTTCCATCTTCGATATTATA
