# Supplementary material for: Involvement of a citrus meiotic recombination TTC-repeat motif in the formation of gross deletions generated by ionizing radiation and MULE activation
Source: PubMed Central journal article supplement (PMC4334395; doi:10.1186/s12864-015-1280-3), 2015-02-13
Supplement: 12864_2015_1280_MOESM14_ESM.pdf [file 12864_2015_1280_MOESM14_ESM.pdf]

**Table S7. Listing of candidate genes tentatively associated with the observed ARR and NER phenotypic traits**

| Seq name        | Hit                                                                       | Term                                      | Phenotypic trait                        |
|-----------------|---------------------------------------------------------------------------|-------------------------------------------|-----------------------------------------|
| Ciclev10024399m | S1 RNA-binding domain-containing protein                                  | Chlorophyll biosynthetic process          | Precociousness. Peel color change       |
| Ciclev10020061m | Geranylgeranyl reductase                                                  | Chlorophyll biosynthetic process          | Precociousness. Peel color change       |
| Ciclev10019304m | Heparanase-like protein 1-like                                            | Chlorophyll metabolic process             | Precociousness. Peel color change       |
| Ciclev10020378m | Malate chloroplastic-like                                                 | Starch and sucrose metabolic process      | Precociousness. Brix accumulation       |
|                 |                                                                           | Carbohydrate metabolic processes          | Precociousness. Brix accumulation       |
|                 |                                                                           | Reductive tricarboxylic acid cycle        | Precociousness. Acid reduction          |
|                 |                                                                           | Pyruvate metabolic process                | Precociousness. Acid reduction          |
| Ciclev10020920m | Movement protein binding protein 2c                                       | Sugar biosynthetic and catabolic process  | Precociousness. Brix accumulation       |
|                 |                                                                           | Plasmodesmata transport                   | Precociousness. Fruit metabolism change |
| Ciclev10019047m | Transcriptional corepressor                                               | Anatomical structure development          | Precociousness                          |
| Ciclev10019317m | Replication protein a 70 kda DNA-binding subunit-like                     | Cell proliferation                        | Precociousness                          |
| Ciclev10020062m | Membrane bound o-acyl transferase family protein                          | Organ senescence                          | Precociousness                          |
| Ciclev10019953m | Phosphatidylinositol glycan anchor biosynthesis class u                   | GPI anchor biosynthetic process           | Precociousness                          |
|                 |                                                                           | Cell division                             |                                         |
| Ciclev10020101m | Flavin-containing monooxygenase fmo gs-ox-like 9-like                     | Phosphatidylinositol biosynthetic process | Precociousness                          |
| Ciclev10023002m | Ptd008 protein                                                            | Phosphatidylinositol biosynthetic process | Precociousness.                         |
| Ciclev10020097m | Protein cobra-like                                                        | Water transport, hyperosmotic response    | Reduced tolerance to flooding           |
| Ciclev10021527m | Protein cobra-like                                                        | Water transport, hyperosmotic response    | Reduced tolerance to flooding           |
|                 |                                                                           | Starch metabolic process                  | Precociousness. Brix accumulation       |
|                 |                                                                           | Defense response to fungus                | Reduced tolerance to fungus             |
| Ciclev10021320m | Synaptosomal associated                                                   | Defense response to fungus                | Reduced tolerance to flooding           |
| Ciclev10022100m | Thaumatococcus-like protein                                               | Defense response to fungus                | Reduced tolerance to flooding           |
| Ciclev10022104m | Thaumatococcus-like protein                                               | Defense response to fungus                | Reduced tolerance to flooding           |
| Ciclev10023840m | Ap2 erf domain-containing transcription factor                            | Defense response to fungus                | Reduced tolerance to flooding           |
| Ciclev10024165m | Probable lrr receptor-like serine threonine-protein kinase at1g74360-like | Defense response to fungus                | Reduced tolerance to flooding           |
