# Supplementary material for: Involvement of a citrus meiotic recombination TTC-repeat motif in the formation of gross deletions generated by ionizing radiation and MULE activation
Source: PubMed Central journal article supplement (PMC4334395; doi:10.1186/s12864-015-1280-3), 2015-02-13
Supplement: 12864_2015_1280_MOESM15_ESM.pdf [file 12864_2015_1280_MOESM15_ESM.pdf]

Table S8. Specific primers for the determinations of gene dosage, allelic frequency (GD1) and chromosome rearrangement boundaries

| Name                         | Frame | Chr | Position | Sequence                    |
|------------------------------|-------|-----|----------|-----------------------------|
| GD <sup>a</sup>              | +     | 3   | 8851426  | 5'-TCCTTGGATTCACGAGACCT-3'  |
|                              | -     | 3   | 8851849  | 5'-GTTAAGGCTGCAAGGAAACG-3'  |
| GD1a                         | +     | 3   | 7429651  | 5'-TGCCCATCATAACACAAAGC-3'  |
|                              | -     | 3   | 7430170  | 5'-CAATTGGAAGGAGCAGAAGG-3'  |
| GD2 <sup>a</sup>             | +     | 3   | 8053193  | 5'-TGCGAATGATACACGCAACT-3'  |
|                              | -     | 3   | 8053552  | 5'-CAATCAAGGCTGCAATTTCC-3'  |
| GD3 <sup>a</sup>             | +     | 3   | 8493139  | 5'-TTGAAGAAGCCTGGGGTAAG-3'  |
|                              | -     | 3   | 8493454  | 5'-ACTTGCACCTGTTGGGAAAC-3'  |
| ARR-5'+CitMul_1 <sup>b</sup> | +     | 3   | 6785140  | 5'-GGTGGATTGGGAACCTACAG-3'  |
|                              | -     | 3   | 6791802  | 5'-CATCCTTGTCGGTAACACAC-3'  |
| ARR-CitMul_1+3 <sup>b</sup>  | +     | 3   | 6785486  | 5'-CTGGCTGCAATTGAACTCG-3'   |
|                              | -     | 3   | 8686913  | 5'-AACTGTCACGGCTCAACCAT-3'  |
| NER-Del8-A <sup>b</sup>      | +     | 8   | 12601782 | 5'-ACGCCTCAGCTTGGTGATAC-3'  |
|                              | -     | 8   | 13511756 | 5'-GTTCCGCAACTAGCTCCATC-3'  |
| NER-Del8-B <sup>b</sup>      | +     | 8   | 13566119 | 5'-TCAGATGCAAGAGCTTGTGAG-3' |
|                              | -     | 8   | 13636531 | 5'-CATGGGAATCAAGATGAGCA-3'  |
| NER-5'-T(8;6) <sup>b</sup>   | +     | 6   | 21997356 | 5'-ATTCATACCGGGCCCTAATC-3'  |
|                              | -     | 8   | 13635261 | 5'-ATGCAGACTTTGCCGGTTAC-3'  |
| NER-3'-T(8;6) <sup>b</sup>   | +     | 8   | 13635106 | 5'-TTCATCCAAAGTGCTTGTGC-3'  |
|                              | -     | 6   | 21998062 | 5'-GCGCTAGTGTTGAGTTGCTG-3'  |

<sup>a</sup> Gene dosage/allelic frequency

<sup>b</sup> Rearrangement boundaries
